# Supplementary material for: Decoding non-canonical mRNA decay by the endoplasmic-reticulum stress sensor IRE1α
Source: PubMed Central journal article supplement (PMC8674358; doi:10.1038/s41467-021-27597-7), 2021-12-15
Supplement: 41467_2021_27597_MOESM2_ESM.pdf [file 41467_2021_27597_MOESM2_ESM.pdf]

## **Description of Additional Supplementary Files**

File Name: Supplementary Data 1

Description: RNA Fragments – SANGER sequences for TNFAIP8L1 and DGAT2

File Name: Supplementary Software 1

Description: The gRIDD program
