# Supplementary material for: Decoding non-canonical mRNA decay by the endoplasmic-reticulum stress sensor IRE1α
Source: PubMed Central journal article supplement (PMC8674358; doi:10.1038/s41467-021-27597-7), 2021-12-15
Supplement: 41467_2021_27597_MOESM5_ESM.pdf [file 41467_2021_27597_MOESM5_ESM.pdf]

## Reporting Summary

Nature Portfolio wishes to improve the reproducibility of the work that we publish. This form provides structure for consistency and transparency in reporting. For further information on Nature Portfolio policies, see our [Editorial Policies](#) and the [Editorial Policy Checklist](#).

### Statistics

For all statistical analyses, confirm that the following items are present in the figure legend, table legend, main text, or Methods section.

n/a Confirmed

- |                                     |                                     |                                                                                                                                                                                                                                                            |
|-------------------------------------|-------------------------------------|------------------------------------------------------------------------------------------------------------------------------------------------------------------------------------------------------------------------------------------------------------|
| <input type="checkbox"/>            | <input checked="" type="checkbox"/> | The exact sample size ( $n$ ) for each experimental group/condition, given as a discrete number and unit of measurement                                                                                                                                    |
| <input type="checkbox"/>            | <input checked="" type="checkbox"/> | A statement on whether measurements were taken from distinct samples or whether the same sample was measured repeatedly                                                                                                                                    |
| <input type="checkbox"/>            | <input checked="" type="checkbox"/> | The statistical test(s) used AND whether they are one- or two-sided<br><i>Only common tests should be described solely by name; describe more complex techniques in the Methods section.</i>                                                               |
| <input checked="" type="checkbox"/> | <input type="checkbox"/>            | A description of all covariates tested                                                                                                                                                                                                                     |
| <input checked="" type="checkbox"/> | <input type="checkbox"/>            | A description of any assumptions or corrections, such as tests of normality and adjustment for multiple comparisons                                                                                                                                        |
| <input type="checkbox"/>            | <input checked="" type="checkbox"/> | A full description of the statistical parameters including central tendency (e.g. means) or other basic estimates (e.g. regression coefficient) AND variation (e.g. standard deviation) or associated estimates of uncertainty (e.g. confidence intervals) |
| <input type="checkbox"/>            | <input checked="" type="checkbox"/> | For null hypothesis testing, the test statistic (e.g. $F$ , $t$ , $r$ ) with confidence intervals, effect sizes, degrees of freedom and $P$ value noted<br><i>Give <math>P</math> values as exact values whenever suitable.</i>                            |
| <input checked="" type="checkbox"/> | <input type="checkbox"/>            | For Bayesian analysis, information on the choice of priors and Markov chain Monte Carlo settings                                                                                                                                                           |
| <input checked="" type="checkbox"/> | <input type="checkbox"/>            | For hierarchical and complex designs, identification of the appropriate level for tests and full reporting of outcomes                                                                                                                                     |
| <input checked="" type="checkbox"/> | <input type="checkbox"/>            | Estimates of effect sizes (e.g. Cohen's $d$ , Pearson's $r$ ), indicating how they were calculated                                                                                                                                                         |

*Our web collection on [statistics for biologists](#) contains articles on many of the points above.*

### Software and code

Policy information about [availability of computer code](#)

Data collection

Image data for western blots were acquired using Azure c600 Imaging system. RNA agarose gels were visualized using a BioRad Molecular Imager ChemiDoc ZRS+. RT-qPCR were acquired using the ABI QuantStudio 7 Flex Real-Time PCR system. Luminescence was acquired using an Envision system from PerkinElmer. Refseq transcripts for analysing RIDD sites were obtained with the biomarrtr package (version 0.9.2) in R, using the getRNA function for organisms "Homo sapiens" and "Mus musculus".

Data analysis

edgeR package (version 3.24.3), R (version 3.5.1 & 4.0.0), limma package (version 3.38.3), GMAP (version 2019-12-01), signalp (version 3.0), survival package (version 2.44-1.1), Graphpad Prism, Microsoft Excel, gRIDD program is available as Supplementary File as part of this paper.

For manuscripts utilizing custom algorithms or software that are central to the research but not yet described in published literature, software must be made available to editors and reviewers. We strongly encourage code deposition in a community repository (e.g. GitHub). See the Nature Portfolio [guidelines for submitting code & software](#) for further information.

### Data

Policy information about [availability of data](#)

All manuscripts must include a [data availability statement](#). This statement should provide the following information, where applicable:

- Accession codes, unique identifiers, or web links for publicly available datasets
- A description of any restrictions on data availability
- For clinical datasets or third party data, please ensure that the statement adheres to our [policy](#)

Protein structures overlay of human B2B dimers onto oligomeric *S. cerevisiae* IRE1 are from the Protein Data Bank with respective accession codes: 6W3C, and 3FBV. Raw sequences and processed data that support the findings of this study are now available at NCBI GEO as GSE169585.

## Field-specific reporting

Please select the one below that is the best fit for your research. If you are not sure, read the appropriate sections before making your selection.

Life sciences  Behavioural & social sciences  Ecological, evolutionary & environmental sciences

For a reference copy of the document with all sections, see [nature.com/documents/nr-reporting-summary-flat.pdf](https://www.nature.com/documents/nr-reporting-summary-flat.pdf)

## Life sciences study design

All studies must disclose on these points even when the disclosure is negative.

|                 |                                                                                                                                                                      |
|-----------------|----------------------------------------------------------------------------------------------------------------------------------------------------------------------|
| Sample size     | we determined the sample size based on similar experimental setups in previous publications.                                                                         |
| Data exclusions | no data were excluded                                                                                                                                                |
| Replication     | Samples were replicated in duplicates or triplicates in a single experiment as stated in the methods. Every experiment was repeated a minimum of two separate times. |
| Randomization   | Only biochemical or cell-based experiments (no animals) were carried out in this study and as such there was no need for randomization of our samples.               |
| Blinding        | Only biochemical or cell-based experiments (no animals) were carried out in this study and as such there was no need for randomization of our samples.               |

## Reporting for specific materials, systems and methods

We require information from authors about some types of materials, experimental systems and methods used in many studies. Here, indicate whether each material, system or method listed is relevant to your study. If you are not sure if a list item applies to your research, read the appropriate section before selecting a response.

### Materials & experimental systems

| n/a                                 | Included in the study                                     |
|-------------------------------------|-----------------------------------------------------------|
| <input type="checkbox"/>            | <input checked="" type="checkbox"/> Antibodies            |
| <input type="checkbox"/>            | <input checked="" type="checkbox"/> Eukaryotic cell lines |
| <input checked="" type="checkbox"/> | <input type="checkbox"/> Palaeontology and archaeology    |
| <input checked="" type="checkbox"/> | <input type="checkbox"/> Animals and other organisms      |
| <input checked="" type="checkbox"/> | <input type="checkbox"/> Human research participants      |
| <input checked="" type="checkbox"/> | <input type="checkbox"/> Clinical data                    |
| <input checked="" type="checkbox"/> | <input type="checkbox"/> Dual use research of concern     |

### Methods

| n/a                                 | Included in the study                           |
|-------------------------------------|-------------------------------------------------|
| <input checked="" type="checkbox"/> | <input type="checkbox"/> ChIP-seq               |
| <input checked="" type="checkbox"/> | <input type="checkbox"/> Flow cytometry         |
| <input checked="" type="checkbox"/> | <input type="checkbox"/> MRI-based neuroimaging |

## Antibodies

Antibodies used

IRE1 $\alpha$  (#3294), TGOLN2 (#95649), AIM2 (#12948), Actin (#3700), and GAPDH (#8884) from Cell Signaling Technology. CD59 (#133707), GBA (#125065), BCAM (#134110), HIP1 (#181238), TLR2 (#68159), SIX2 (#111827), SUOX (#129094), and BMP4 (#124715) from Abcam. BLOC1S1 (#19687-1-AP), OAS2 (#19279-1-AP), ALDH1A3 (#25167-1-AP), GPC1 (#16700-1-AP) from ProteinTech. pIRE1 and XBP1s antibodies were generated at Genentech. Secondary antibodies (rabbit #711-035-152 and mouse #715-035-150) were from Jackson ImmunoResearch Laboratories. mono-Rat IgG2b (#553986) from BD Pharmingen. Anti-hIRE1 $\alpha$  for microscopy was made in-house at Genentech (GN35-18.ratIgG2b).

Validation

The antibodies used in this study were validated by the manufacturers and can be checked using their respective catalog # on the following websites:  
 Cell Signaling: <https://www.cellsignal.com/>  
 Abcam: <https://www.abcam.com/>  
 ProteinTech: <https://www.ptglab.com/>  
 Jackson ImmunoResearch Laboratories: <https://www.jacksonimmuno.com/>  
 BD Pharmingen: <https://www.bdbiosciences.com/en-us/products/reagents/flow-cytometry-reagents/research-reagents/flow-cytometry-controls-and-lysates/purified-rat-igg2b-isotype-control.553986>  
 In-house pIRE1 and XBP1s antibodies, see Chang et al. *J. Mol. Cell.* 2018.06.038 were tested by Western Blots, comparing WT and gene-specific knock-down by RNAi.  
 In-house human IRE1 $\alpha$  antibody was previously reported in Harnoss et al., 2020, *Cancer Research: IRE1 $\alpha$  Disruption in Triple-Negative Breast Cancer Cooperates with Antiangiogenic Therapy by Reversing ER Stress Adaptation and Remodeling the Tumor Microenvironment.*

## Eukaryotic cell lines

---

Policy information about [cell lines](#)

Cell line source(s)

MDAMB231, HCC1806, KMS27, HCT116, AMO1, and U2OS cells were obtained from ATCC and maintained in an internal repository at Genentech.

Authentication

short tandem repeat (STR) profiles

Mycoplasma contamination

tested to ensure mycoplasma free within 3 months of use

Commonly misidentified lines  
(See [ICLAC](#) register)

none
